# Supplementary material
Source: publisher site journal article supplement (https://www.dovepress.com/article/332713)
Supplement: Supplementary file 1 [file get_supplementary_file.php]

## Supplementary Figure 1

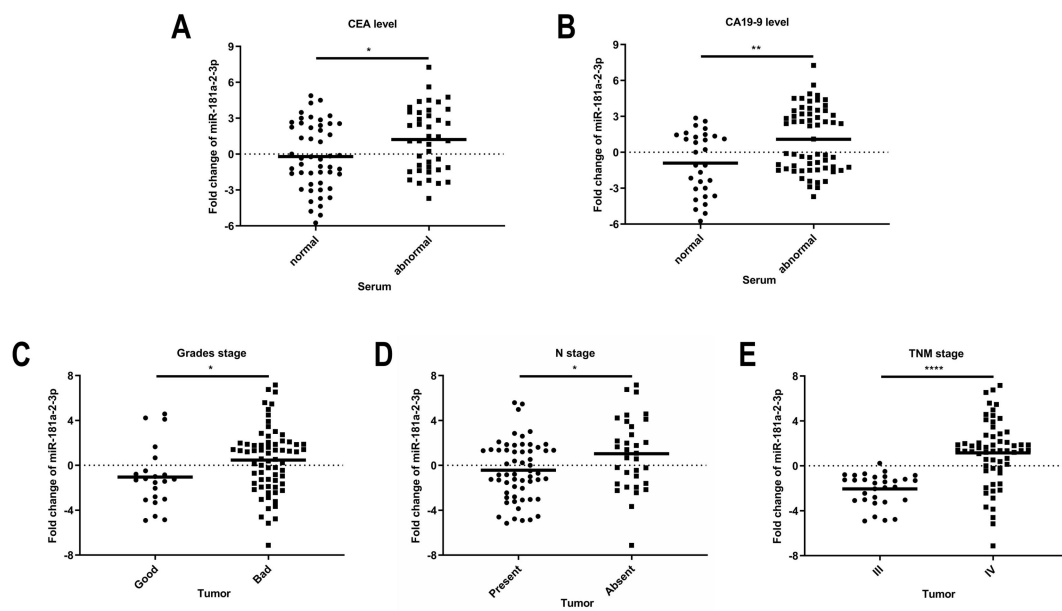

Expression levels of miR-181a-2-3p in different human gastric cancer clinicopathological characteristics. (**A** and **B**) miR-181a-2-3p expression was obviously increased in abnormal CEA level ( $P=0.0200$ )(**A**) and abnormal CA19-9 level ( $P=0.0015$ )(**B**) in GC serum specimens. (**C-E**) miR-181a-2-3p expression was obviously increased in worse Grades stage (G3+G4,  $P=0.0184$ )(**C**), present lymph node metastasis ( $P=0.0280$ )(**D**), and higher TNM stage (IV,  $P<0.0001$ )(**E**) in GC tumor samples.

**Supplementary Table 1**

Differentially expressed miRNAs in three datasets.

| SGC-7901/DDP vs. SGC-7901 | BGC-823/DDP vs. BGC-823 | MGC-803/DDP vs. MGC-803 |
|---------------------------|-------------------------|-------------------------|
| hsa-mir-744               | hsa-mir-99a             | hsa-mir-124-3p          |
| hsa-mir-1301              | hsa-mir-505             | hsa-mir-9-5p            |
| hsa-mir-491               | hsa-mir-422a            | hsa-mir-204-5p          |
| hsa-mir-423-3p            | hsa-mir-342-3p          | hsa-mir-146a-5p         |
| hsa-mir-455               | hsa-mir-345             | hsa-mir-129-5p          |
| hsa-mir-324-3p            | hsa-mir-421             | hsa-mir-127-3p          |
| hsa-mir-1296              | hsa-mir-125b-2-5p       | hsa-mir-211-5p          |
| hsa-mir-505               | hsa-mir-149             | hsa-mir-486-5p          |
| hsa-mir-874               | hsa-mir-1301            | hsa-mir-9-3p            |
| ENSG00000238321           | hsa-mir-625             | hsa-mir-381-3p          |
| hsa-mir-346               | hsa-mir-103-as          | hsa-mir-3180            |
| hsa-mir-152               | hsa-mir-188             | hsa-mir-3180-3p         |
| hsa-mir-212               | hsa-mir-491             | hsa-mir-370-3p          |
| hsa-mir-320b              | hsa-mir-452             | hsa-mir-135a-5p         |
| hsa-mir-99b               | hsa-mir-346             | hsa-mir-146b-5p         |
| hsa-mir-125b-2-3p         | hsa-mir-3200            | hsa-mir-522-5p          |
| hsa-mir-320a              | hsa-mir-1973            | hsa-mir-519b-5p         |
| hsa-mir-99a               | hsa-mir-378c            | hsa-mir-519a-5p         |
| hsa-mir-423-5p            | hsa-mir-342-5p          | hsa-mir-518e-5p         |
| hsa-mir-324-5p            | hsa-mir-378-3p          | hsa-mir-523-5p          |
| hsa-mir-200c              | hsa-mir-210             | hsa-mir-519c-5p         |
| hsa-mir-345               | hsa-mir-378-5p          | hsa-mir-7977            |
| hsa-mir-582               | hsa-mir-193a            | hsa-mir-543             |
| hsa-mir-1180              | ACA20                   | hsa-mir-433-3p          |
| hsa-mir-320c              | hsa-mir-183             | hsa-mir-1244            |
| hsa-mir-23b               | hsa-mir-663b            | hsa-mir-486-3p          |
| hsa-mir-3172              | hsa-mir-128             | hsa-mir-6724-5p         |
| hsa-mir-99b-3p            | hsa-mir-10a             | hsa-mir-663a            |
| hsa-mir-217               | hsa-mir-615             | hsa-mir-124-5p          |
| hsa-mir-1307              | hsa-mir-28              | hsa-mir-382-5p          |
| hsa-mir-769               | SNORD126                | hsa-mir-1306-3p         |
| hsa-mir-138               | U83                     | hsa-mir-1-3p            |
| hsa-mir-22-3p             | hsa-mir-455             | hsa-mir-1285-5p         |
| hsa-mir-130b              | hsa-mir-935-3p          | hsa-mir-3913-5p         |
| ACA57-3p                  | hsa-mir-151             | hsa-mir-181a-2-3p       |
| hsa-mir-374a              | hsa-mir-1910            |                         |
| hsa-mir-2110              | v49_ENSG00000201038     |                         |
| ACA57-5p                  | hsa-mir-221             |                         |
| U14A                      | hsa-mir-1246            |                         |
| ENSG00000238473           | hsa-mir-4286            |                         |

|                   |                   |
|-------------------|-------------------|
| hsa-mir-181a-2-3p | hsa-mir-20a       |
| hsa-mir-181a      | hsa-mir-503       |
| hsa-mir-424       | hsa-mir-3156      |
| hsa-mir-338       | hsa-mir-424       |
| hsa-mir-181b      | hsa-mir-3147      |
| hsa-mir-181d      | hsa-mir-886-3p    |
| hsa-mir-29b-1-3p  | hsa-mir-1183      |
| hsa-mir-139       | hsa-mir-3154      |
| mgH28S-2409       | hsa-mir-1182      |
| hsa-mir-27a-3p    | hsa-mir-3138      |
| hsa-mir-27a-5p    | hsa-mir-148a      |
| hsa-mir-222       | hsa-mir-3178      |
| hsa-mir-181c      | hsa-mir-3175      |
| U14B              | hsa-mir-936       |
| hsa-mir-27a       | hsa-mir-4271      |
| U60-3p            | ACA44-3p          |
| hsa-mir-140       | ENSG00000252840   |
| hsa-mir-24-2-3p   | hsa-mir-886-5p    |
| ACA40             | ENSG00000207187   |
| U60-5p            | ENSG00000201619   |
| hsa-mir-505-3p    | hsa-mir-3162      |
| hsa-mir-29a       | hsa-mir-194       |
| hsa-mir-503       | hsa-mir-27a       |
| ACA18             | hsa-mir-192       |
| hsa-mir-935       | ACA61             |
| hsa-mir-7-1-3p    | hsa-mir-483       |
| hsa-mir-23a       | U75-3p            |
| U82               | ACA16             |
|                   | hsa-mir-675       |
|                   | hsa-mir-1228      |
|                   | ACA10             |
|                   | hsa-mir-23a       |
|                   | hsa-mir-1207      |
|                   | hsa-mir-196b      |
|                   | ACA44-5p          |
|                   | U44               |
|                   | hsa-mir-197       |
|                   | U75-5p            |
|                   | hsa-mir-181c      |
|                   | hsa-mir-466       |
|                   | U76               |
|                   | hsa-mir-181a-2-3p |
|                   | ENSG00000221300   |

hsa-mir-765

U70

hsa-mir-885

U17b-3p

hsa-mir-616

U17b-5p

U81

hsa-mir-4257

hsa-mir-3196

hsa-mir-3202

ENSG00000201346

---
